# Supplementary material
Source: MDPI journal article supplement (https://www.mdpi.com/2071-1050/14/15/9664)
Supplement: s1 [file s1]

# Blue and green water footprint of agro-industrial avocado production in central Mexico

Alberto F. Gómez-Tagle <sup>1,2,†</sup>, Alberto Gómez-Tagle <sup>1,\*</sup>, Diana J. Fuerte-Velázquez <sup>3</sup>, Alma G. Barajas-Alcalá <sup>1</sup>, Fernando Quiroz-Rivera <sup>1,4</sup>, Pablo E. Alarcón-Chaires <sup>5,†</sup> and Hilda Guerrero-García-Rojas <sup>6</sup>

<sup>1</sup> Earth Science Department, Natural Resources Institute (INIRENA), Universidad Michoacana de San Nicolás de Hidalgo, Morelia 58330, Mexico; alma.barajas@umich.mx (A.G.B.-A.); 1215838k@umich.mx (F.Q.-R.)

<sup>2</sup> Alto-Fresno Ecohydrological Station, Tiro, Morelia 58346, México

<sup>3</sup> Graduate Program in Sustainability, Faculty of Economy, Universidad Michoacana de San Nicolás de Hidalgo, Morelia 58030, Mexico; diana.fuerte@umich.mx

<sup>4</sup> Graduate Program in Integrative Ecology (MCEI), Natural Resources Institute, Universidad Michoacana de San Nicolás de Hidalgo, Morelia 58330, Mexico

<sup>5</sup> Ecosystem and Sustainability Research Institute (IIES), National Autonomous University of Mexico (UNAM), Morelia 58341, Mexico

<sup>6</sup> Faculty of Economy, Universidad Michoacana de San Nicolás de Hidalgo, Morelia 58030, Mexico; hilda.guerrero@umich.mx

\* Correspondence: algomez@umich.mx; Tel.: +52-443-3272350 (ext. 109).

† Deceased.

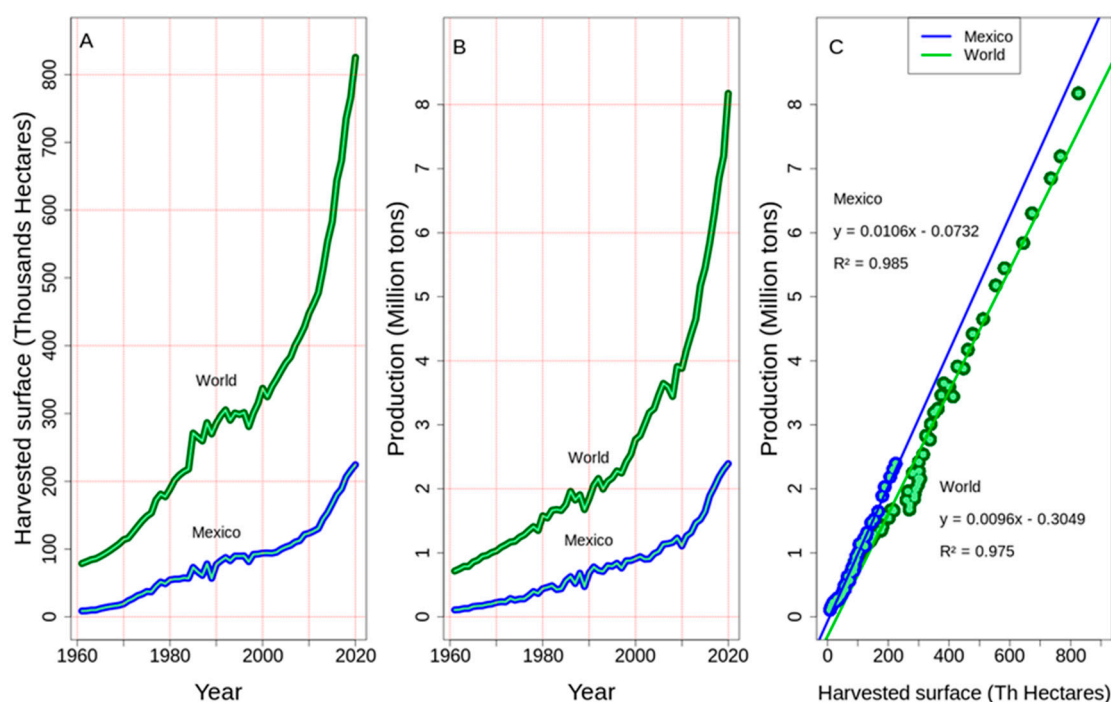

Figure S1. Avocado Mexico production.

**Table S1.** Mensuales Uruapan Artículo Supplementary Data.

| <b>date</b> | <b>Prec (mm)</b> | <b>Tmax (°C)</b> | <b>Tmin (°C)</b> | <b>T.mean (°C)</b> | <b>RH (%)</b> | <b>W.speed (km/hr)</b> |
|-------------|------------------|------------------|------------------|--------------------|---------------|------------------------|
| 2011-12-15  | 1.0              | 18.7             | 6.9              | 12.0               | 68.6          | 7.1                    |
| 2012-01-15  | 0.8              | 17.9             | 6.2              | 11.3               | 65.5          | 6.9                    |
| 2012-02-15  | 34.4             | 17.2             | 7.8              | 12.0               | 74.8          | 6.2                    |
| 2012-03-15  | 0.0              | 20.2             | 8.1              | 13.6               | 62.2          | 6.9                    |
| 2012-04-15  | 0.4              | 21.9             | 8.6              | 15.0               | 43.8          | 7.1                    |
| 2012-05-15  | 62.4             | 22.0             | 10.7             | 16.0               | 68.5          | 6.0                    |
| 2012-06-15  | 233.4            | 20.1             | 11.2             | 15.3               | 82.5          | 5.2                    |
| 2012-07-15  | 414.4            | 18.9             | 10.8             | 14.2               | 88.1          | 5.5                    |
| 2012-08-15  | 403.2            | 19.3             | 11.4             | 14.7               | 87.4          | 6.1                    |
| 2012-09-15  | 272.8            | 19.4             | 10.8             | 14.4               | 87.0          | 5.9                    |
| 2012-10-15  | 71.2             | 20.0             | 10.1             | 14.4               | 84.9          | 6.0                    |
| 2012-11-15  | 106.4            | 18.1             | 8.4              | 12.7               | 81.2          | 6.4                    |
| 2012-12-15  | 0.0              | 18.6             | 7.0              | 12.1               | 69.7          | 6.9                    |
| 2013-01-15  | 31.4             | 17.4             | 7.2              | 11.6               | 75.7          | 6.5                    |
| 2013-02-15  | 0.6              | 20.5             | 7.0              | 13.1               | 57.9          | 7.2                    |
| 2013-03-15  | 0.0              | 20.0             | 7.5              | 12.9               | 46.1          | 7.2                    |
| 2013-04-15  | 0.0              | 22.8             | 8.8              | 15.5               | 42.6          | 6.6                    |
| 2013-05-15  | 45.0             | 22.9             | 10.2             | 16.0               | 57.3          | 6.3                    |
| 2013-06-15  | 182.0            | 20.1             | 11.6             | 15.3               | 87.5          | 5.3                    |
| 2013-07-15  | 284.2            | 19.3             | 10.7             | 14.4               | 88.5          | 5.7                    |
| 2013-08-15  | 293.0            | 19.3             | 10.9             | 14.5               | 87.4          | 6.1                    |
| 2013-09-15  | 622.4            | 18.3             | 12.1             | 14.7               | 92.3          | 5.5                    |
| 2013-10-15  | 107.2            | 19.7             | 10.9             | 14.5               | 89.2          | 5.8                    |
| 2013-11-15  | 105.0            | 18.8             | 9.7              | 13.5               | 85.0          | 6.4                    |
| 2013-12-15  | 9.9              | 18.8             | 7.1              | 12.2               | 75.9          | 6.6                    |
| 2014-01-15  | 17.4             | 18.3             | 6.1              | 11.5               | 70.3          | 6.7                    |
| 2014-02-15  | 2.2              | 21.0             | 7.0              | 13.3               | 61.4          | 7.0                    |
| 2014-03-15  | 0.0              | 21.7             | 7.2              | 13.8               | 59.1          | 7.1                    |
| 2014-04-15  | 3.4              | 23.3             | 9.3              | 15.6               | 55.9          | 6.7                    |
| 2014-05-15  | 145.8            | 21.3             | 9.9              | 14.9               | 82.2          | 5.6                    |
| 2014-06-15  | 395.8            | 19.9             | 11.3             | 15.0               | 91.8          | 5.0                    |
| 2014-07-15  | 261.2            | 20.2             | 10.8             | 14.7               | 84.5          | 5.9                    |
| 2014-08-15  | 306.2            | 20.2             | 10.6             | 14.7               | 88.5          | 5.7                    |
| 2014-09-15  | 264.8            | 19.4             | 11.4             | 14.6               | 91.1          | 5.9                    |
| 2014-10-15  | 232.2            | 19.9             | 10.1             | 14.0               | 89.0          | 5.9                    |
| 2014-11-15  | 47.0             | 18.5             | 8.4              | 12.7               | 81.6          | 5.9                    |
| 2014-12-15  | 1.0              | 18.4             | 6.8              | 11.7               | 75.3          | 6.5                    |
| 2015-01-15  | 19.6             | 18.8             | 7.6              | 12.3               | 72.2          | 6.5                    |
| 2015-02-15  | 43.2             | 18.9             | 6.8              | 11.9               | 73.6          | 6.5                    |
| 2015-03-15  | 289.6            | 19.1             | 7.5              | 12.4               | 76.5          | 6.4                    |
| 2015-04-15  | 9.4              | 22.1             | 9.5              | 15.0               | 70.4          | 6.2                    |
| 2015-05-15  | 145.4            | 21.6             | 10.8             | 15.4               | 81.8          | 5.5                    |
| 2015-06-15  | 347.0            | 20.1             | 11.6             | 14.9               | 91.0          | 5.1                    |
| 2015-07-15  | 257.6            | 20.5             | 10.9             | 14.7               | 87.6          | 5.7                    |
| 2015-08-15  | 249.6            | 20.7             | 11.0             | 14.8               | 89.9          | 5.6                    |
| 2015-09-15  | 291.2            | 19.9             | 11.1             | 14.6               | 93.4          | 5.4                    |
| 2015-10-15  | 571.4            | 20.2             | 10.9             | 14.8               | 90.0          | 5.7                    |
| 2015-11-15  | 59.0             | 20.9             | 10.5             | 14.8               | 87.5          | 6.0                    |
| 2015-12-15  | 15.6             | 18.5             | 8.0              | 12.5               | 83.8          | 6.3                    |
| 2016-01-15  | 18.4             | 17.8             | 4.5              | 10.6               | 68.0          | 6.8                    |
| 2016-02-15  | 0.0              | 20.7             | 6.1              | 12.7               | 63.6          | 6.9                    |
| 2016-03-15  | 36.8             | 20.2             | 6.2              | 12.7               | 64.3          | 6.8                    |
| 2016-04-15  | 0.2              | 23.7             | 8.8              | 15.8               | 48.9          | 6.9                    |
| 2016-05-15  | 49.0             | 24.5             | 10.3             | 16.9               | 70.2          | 5.7                    |
| 2016-06-15  | 296.0            | 20.7             | 10.1             | 14.8               | 88.8          | 5.0                    |
| 2016-07-15  | 235.6            | 20.5             | 10.1             | 14.8               | 88.5          | 5.3                    |
| 2016-08-15  | 291.4            | 20.3             | 10.4             | 14.7               | 91.4          | 5.3                    |
| 2016-09-15  | 335.4            | 20.2             | 10.1             | 14.4               | 92.1          | 5.7                    |
| 2016-10-15  | 144.8            | 20.5             | 9.5              | 14.3               | 87.8          | 5.9                    |

|                   |              |             |             |             |             |            |
|-------------------|--------------|-------------|-------------|-------------|-------------|------------|
| 2016-11-15        | 90.8         | 19.1        | 8.1         | 13.0        | 85.6        | 6.1        |
| 2016-12-15        | 33.0         | 19.5        | 7.3         | 12.9        | 76.2        | 6.6        |
| <b>2017-01-15</b> | <b>0.0</b>   | <b>19.3</b> | <b>5.0</b>  | <b>11.5</b> | <b>65.5</b> | <b>7.0</b> |
| <b>2017-02-15</b> | <b>3.6</b>   | <b>20.3</b> | <b>5.5</b>  | <b>12.2</b> | <b>60.5</b> | <b>7.1</b> |
| <b>2017-03-15</b> | <b>4.2</b>   | <b>21.8</b> | <b>7.1</b>  | <b>13.8</b> | <b>62.9</b> | <b>6.7</b> |
| <b>2017-04-15</b> | <b>0.0</b>   | <b>23.8</b> | <b>7.5</b>  | <b>15.2</b> | <b>42.8</b> | <b>7.0</b> |
| <b>2017-05-15</b> | <b>14.2</b>  | <b>24.5</b> | <b>9.6</b>  | <b>16.7</b> | <b>66.2</b> | <b>6.1</b> |
| <b>2017-06-15</b> | <b>272.6</b> | <b>21.2</b> | <b>10.8</b> | <b>15.5</b> | <b>91.8</b> | <b>4.9</b> |
| <b>2017-07-15</b> | <b>456.6</b> | <b>20.0</b> | <b>10.2</b> | <b>14.4</b> | <b>92.1</b> | <b>5.1</b> |
| <b>2017-08-15</b> | <b>555.6</b> | <b>20.2</b> | <b>11.0</b> | <b>15.0</b> | <b>94.0</b> | <b>5.4</b> |
| <b>2017-09-15</b> | <b>311.8</b> | <b>20.0</b> | <b>10.7</b> | <b>14.7</b> | <b>94.4</b> | <b>5.3</b> |
| <b>2017-10-15</b> | <b>94.6</b>  | <b>20.8</b> | <b>9.5</b>  | <b>14.6</b> | <b>87.0</b> | <b>6.2</b> |
| <b>2017-11-15</b> | <b>11.8</b>  | <b>20.5</b> | <b>6.8</b>  | <b>13.0</b> | <b>80.0</b> | <b>6.7</b> |
| <b>2017-12-15</b> | <b>0.0</b>   | <b>19.0</b> | <b>6.3</b>  | <b>11.9</b> | <b>74.8</b> | <b>6.6</b> |
| 2018-01-15        | 32.6         | 18.8        | 5.7         | 11.5        | 70.2        | 6.8        |
| 2018-02-15        | 3.0          | 20.0        | 7.3         | 12.9        | 75.4        | 6.4        |
| 2018-03-15        | 6.0          | 22.9        | 7.7         | 14.5        | 60.2        | 6.9        |
| 2018-04-15        | 0.0          | 23.7        | 8.2         | 15.5        | 54.8        | 6.5        |
| 2018-05-15        | 143.2        | 22.8        | 9.9         | 15.8        | 83.2        | 5.5        |
| 2018-06-15        | 95.8         | 20.5        | 10.7        | 15.3        | 91.3        | 4.3        |
